# Supplementary material
Source: publisher site journal article supplement (https://oneecosystem.pensoft.net/article/download/suppl/6886585/)
Supplement: Supplementary file 1

**Table A1. Relevant datasets available at national and catchment level to develop extent and condition accounts for the Dargle.**

Notes: ex: extent; t: type; ac: ancillary data; c: condition;* [Soil Information System](http://gis.teagasc.ie/soils/map.php); †Data on listed habitats only, within each ET.

Opensource datasets available from: <https://data.gov.ie/>

| **Ecosystem Type (ET)** | **Remote sensing data / HRLs** | **Habitat surveys** | **Condition data** | **Ancillary / Land use data / pressures** | **Catchment related survey** |
| --- | --- | --- | --- | --- | --- |
| Freshwater | EPA River and lakes dataset (based on Prime 2 dataset)  Riparian (2012) (ex)  Wetness (2015, 2018) (ex) | [Map of Irish Wetlands](http://www.wetlandsurveysireland.com/wetlands/map-of-irish-wetlands--/) (t) | Water Framework Directive  †Article 17 reporting (ex/t/c) | WFD Protection status (salmonid, protected drinking water)  WFD Characterisation and PAAs  EPA MQI (Morphological Quality Index)  [EPA Hydrometrics](https://www.epa.ie/water/wm/hydrometrics/)  Arterial drainage | Wicklow County Council wetlands survey (ex/t) (2012)  Dun Laoghaire Rathdown Local Authority (2020) habitats survey (ex/t)  Commonage survey as part of the [SUAS EIP](https://ec.europa.eu/eip/agriculture/en/find-connect/projects/sustainable-uplands-agri-environment-scheme-suas) (2020) |
| Woodlands and Forest | Dominant Leaf Type and Tree Cover Density (2012, 2015, 2018) (ex/t)  Small Woody Features (SWF) (ex) (2015, 2018) | Ancient and Long-Established Woodland Survey (2010)  National Native Woodland Survey (2010) | †Article 17 reporting (ex/t/c) | [National Forest Inventory](https://www.gov.ie/en/publication/65294-irelands-national-forest-inventory/) (ex/t/ac)  Commercial forest data (e/t/ac) (annual) |  |
| Peatlands and Heathlands | DIPMV.2 (2011) (ex) (Connolly, |  | †Article 17 reporting (ex/t/c) | SIS* (2006) (ex) | Wicklow Mountains SAC (2006-2007) (ex/t) |
| Grassland and Cropland | Grassland High Resolution (2015, 2018) (ex)  PLOUGH (2015) (ex) | Irish Semi-Natural Grassland Survey (2016)  Grassland Monitoring Project (2015-2017) | †Article 17 reporting (ex/t/c) | SIS* (2006) (ex)  LPIS (annual)  High Nature Value farmland (HNVf) (2015) |  |
| Coastal |  | Saltmarsh monitoring project (2006-2008)  Coastal monitoring project (2004-2006; 2009) | Water Framework Directive  †Article 17 reporting (ex/t/c) | Blue Flag status |  |
| Urban | Urban Atlas and Soil imperviousness (2006, 2009, 2012, 2015, 2018) (ex)  Urban Atlas Street Tree layers (2012, 2018) (ex) |  | †Article 17 reporting (listed habitats within urban areas) (ex/t/c) | Development plans |  |
| **Cross-cutting datasets** | CORINE 2000, 2006, 2012, 2018 |  |  | Accessibility, Elevation; Invasive species, SIS*  Natura 2000 network  National nature network (NHA etc) |  |
